# Supplementary material
Source: PubMed Central journal article supplement (PMC6217961)
Supplement: NIHMS988973-supplement-supplement.pdf [file NIHMS988973-supplement-supplement.pdf]

## Supplementary Online Content

Topjian AA, Telford R, Holubkov R, et al; Therapeutic Hypothermia After Pediatric Cardiac Arrest (THAPCA) Trial Investigators. Association of early postresuscitation hypotension with survival to discharge after targeted temperature management for pediatric out-of-hospital cardiac arrest. *JAMA Pediatr*. Published online December 11, 2017. doi:10.1001/jamapediatrics.2017.4043

### **eTable.** Patient and Cardiac Arrest Characteristics by Targeted Temperature Management Intervention

This supplementary material has been provided by the authors to give readers additional information about their work.

**eTable. Patient and Cardiac Arrest Characteristics by Targeted Temperature Management Intervention**

|                                                               | Overall<br>(N = 292) | Treatment Received       |                           |
|---------------------------------------------------------------|----------------------|--------------------------|---------------------------|
|                                                               |                      | Hypothermia<br>(N = 153) | Normothermia<br>(N = 139) |
| <b>Age at randomization (months):</b> Median [Q1, Q3]         | 23.0 [5.0, 105.0]    | 24.0 [6.0, 120.0]        | 19.0 [4.0, 85.0]          |
| <b>Male</b>                                                   | 194 (66.4%)          | 101 (66.0%)              | 93 (66.9%)                |
| <b>Race</b>                                                   |                      |                          |                           |
| Black or African American                                     | 65 (22.3%)           | 28 (18.3%)               | 37 (26.6%)                |
| White                                                         | 174 (59.6%)          | 97 (63.4%)               | 77 (55.4%)                |
| Other/Unknown                                                 | 53 (18.2%)           | 28 (18.3%)               | 25 (18.0%)                |
| <b>Ethnicity</b>                                              |                      |                          |                           |
| Hispanic or Latino                                            | 65 (22.3%)           | 38 (24.8%)               | 27 (19.4%)                |
| Not Hispanic or Latino                                        | 214 (73.3%)          | 109 (71.2%)              | 105 (75.5%)               |
| Unknown                                                       | 13 (4.5%)            | 6 (3.9%)                 | 7 (5.0%)                  |
| <b>Pre-existing chronic conditions</b>                        |                      |                          |                           |
| None                                                          | 150 (51.4%)          | 79 (51.6%)               | 71 (51.1%)                |
| Prenatal                                                      | 36 (12.3%)           | 14 (9.2%)                | 22 (15.8%)                |
| Lung or airway disease                                        | 66 (22.6%)           | 32 (20.9%)               | 34 (24.5%)                |
| Congenital heart disease                                      | 35 (12.0%)           | 14 (9.2%)                | 21 (15.1%)                |
| Gastrointestinal                                              | 41 (14.0%)           | 19 (12.4%)               | 22 (15.8%)                |
| Neurologic                                                    | 49 (16.8%)           | 30 (19.6%)               | 19 (13.7%)                |
| Other                                                         | 71 (24.3%)           | 35 (22.9%)               | 36 (25.9%)                |
| <b>Night or weekend arrest</b>                                | 141 (48.3%)          | 75 (49.0%)               | 66 (47.5%)                |
| <b>Initial cardiac arrest rhythm noted by EMS or hospital</b> |                      |                          |                           |
| Asystole                                                      | 172 (58.9%)          | 85 (55.6%)               | 87 (62.6%)                |
| Bradycardia                                                   | 19 (6.5%)            | 9 (5.9%)                 | 10 (7.2%)                 |
| Pulseless electrical activity (PEA)                           | 42 (14.4%)           | 25 (16.3%)               | 17 (12.2%)                |
| Ventricular fibrillation or tachycardia                       | 23 (7.9%)            | 14 (9.2%)                | 9 (6.5%)                  |
| Unknown                                                       | 36 (12.3%)           | 20 (13.1%)               | 16 (11.5%)                |
| <b>Primary cause of cardiac arrest</b>                        |                      |                          |                           |
| Cardiac                                                       | 37 (12.7%)           | 16 (10.5%)               | 21 (15.1%)                |
| Respiratory                                                   | 211 (72.3%)          | 110 (71.9%)              | 101 (72.7%)               |
| Other                                                         | 10 (3.4%)            | 9 (5.9%)                 | 1 (0.7%)                  |

|                                                                                 |                      |                      |                      |
|---------------------------------------------------------------------------------|----------------------|----------------------|----------------------|
| Unknown                                                                         | 34 (11.6%)           | 18 (11.8%)           | 16 (11.5%)           |
| <b>Cardiac arrest witnessed</b>                                                 | 108 (37.0%)          | 57 (37.3%)           | 51 (36.7%)           |
| <b>Chest compressions administered by bystander</b>                             | 183 (62.7%)          | 99 (64.7%)           | 84 (60.4%)           |
| <b>Estimated duration of chest compressions</b>                                 |                      |                      |                      |
| Less than or equal to 15 minutes                                                | 66 (22.6%)           | 36 (23.5%)           | 30 (21.6%)           |
| More than 15 to less than or equal to 30 minutes                                | 109 (37.3%)          | 61 (39.9%)           | 48 (34.5%)           |
| More than 30 minutes                                                            | 106 (36.3%)          | 48 (31.4%)           | 58 (41.7%)           |
| Unable to determine                                                             | 11 (3.8%)            | 8 (5.2%)             | 3 (2.2%)             |
| <b>Total number of doses of epinephrine administered by EMS and at hospital</b> |                      |                      |                      |
| 0                                                                               | 19 (6.5%)            | 13 (8.5%)            | 6 (4.3%)             |
| 1                                                                               | 35 (12.0%)           | 18 (11.8%)           | 17 (12.2%)           |
| 2                                                                               | 51 (17.5%)           | 22 (14.4%)           | 29 (20.9%)           |
| 3                                                                               | 40 (13.7%)           | 21 (13.7%)           | 19 (13.7%)           |
| 4                                                                               | 41 (14.0%)           | 26 (17.0%)           | 15 (10.8%)           |
| More than 4                                                                     | 76 (26.0%)           | 34 (22.2%)           | 42 (30.2%)           |
| Missing                                                                         | 30 (10.3%)           | 19 (12.4%)           | 11 (7.9%)            |
| <b>Time between ROSC and treatment initiation (hours): (N) Median [Q1, Q3]</b>  | (292) 5.8 [5.1, 6.5] | (153) 5.9 [5.2, 6.7] | (139) 5.8 [5.1, 6.4] |
| <b>Any hypotension (Induction/Maintenance)</b>                                  | 145 (49.7%)          | 73 (47.7%)           | 72 (51.8%)           |
| <b>Burden of hypotension (Induction/Maintenance): (N) Median [Q1, Q3]</b>       | (292) 0.0 [0.0, 7.7] | (153) 0.0 [0.0, 5.9] | (139) 1.9 [0.0, 9.3] |
| <b>Any hypotension (Re-warming)</b>                                             | 54/213 (25.4%)       | 35/118 (29.7%)       | 19/95 (20.0%)        |
| <b>Burden of hypotension (Re-warming): (N) Median [Q1, Q3]</b>                  | (213) 0.0 [0.0, 3.2] | (118) 0.0 [0.0, 5.6] | (95) 0.0 [0.0, 0.0]  |
| <b>Number of Vasoactive Agents - Day 0</b>                                      |                      |                      |                      |
| 0                                                                               | 142 (48.6%)          | 74 (48.4%)           | 68 (48.9%)           |
| 1                                                                               | 79 (27.1%)           | 44 (28.8%)           | 35 (25.2%)           |
| 2                                                                               | 58 (19.9%)           | 29 (19.0%)           | 29 (20.9%)           |
| 3                                                                               | 13 (4.5%)            | 6 (3.9%)             | 7 (5.0%)             |
| <b>Milrinone - Day 0</b>                                                        | 22 (7.5%)            | 10 (6.5%)            | 12 (8.6%)            |
| <b>Steroids (hydrocortisone, methylprednisolone [Solu-medrol]) - Day 0</b>      | 33 (11.3%)           | 13 (8.5%)            | 20 (14.4%)           |

|                                                                                |                    |                |                |
|--------------------------------------------------------------------------------|--------------------|----------------|----------------|
| <b>Vasopressin (USP) - Day 0</b>                                               | 27 (9.2%)          | 14 (9.2%)      | 13 (9.4%)      |
| <b>Number of Vasoactive Agents - Day 1</b>                                     |                    |                |                |
| 0                                                                              | 125/283<br>(44.2%) | 68/152 (44.7%) | 57/131 (43.5%) |
| 1                                                                              | 76/283 (26.9%)     | 41/152 (27.0%) | 35/131 (26.7%) |
| 2                                                                              | 69/283 (24.4%)     | 38/152 (25.0%) | 31/131 (23.7%) |
| 3                                                                              | 13/283 (4.6%)      | 5/152 (3.3%)   | 8/131 (6.1%)   |
| <b>Milrinone - Day 1</b>                                                       | 31/283 (11.0%)     | 13/152 (8.6%)  | 18/131 (13.7%) |
| <b>Steroids (Hydrocortisone,<br/>Methylprednisolone [Solu-medrol]) - Day 1</b> | 40/283 (14.1%)     | 17/152 (11.2%) | 23/131 (17.6%) |
| <b>Vasopressin (USP) - Day 1</b>                                               | 53/283 (18.7%)     | 23/152 (15.1%) | 30/131 (22.9%) |
| <b>Number of Vasoactive Agents - Day 2</b>                                     |                    |                |                |
| 0                                                                              | 135/246<br>(54.9%) | 65/134 (48.5%) | 70/112 (62.5%) |
| 1                                                                              | 66/246 (26.8%)     | 39/134 (29.1%) | 27/112 (24.1%) |
| 2                                                                              | 41/246 (16.7%)     | 29/134 (21.6%) | 12/112 (10.7%) |
| 3                                                                              | 4/246 (1.6%)       | 1/134 (0.7%)   | 3/112 (2.7%)   |
| <b>Milrinone - Day 2</b>                                                       | 26/246 (10.6%)     | 12/134 (9.0%)  | 14/112 (12.5%) |
| <b>Steroids (Hydrocortisone,<br/>Methylprednisolone [Solu-medrol]) - Day 2</b> | 28/246 (11.4%)     | 10/134 (7.5%)  | 18/112 (16.1%) |
| <b>Vasopressin (USP) - Day 2</b>                                               | 37/246 (15.0%)     | 19/134 (14.2%) | 18/112 (16.1%) |
| <b>Number of Vasoactive Agents - Day 3</b>                                     |                    |                |                |
| 0                                                                              | 126/227<br>(55.5%) | 60/125 (48.0%) | 66/102 (64.7%) |
| 1                                                                              | 64/227 (28.2%)     | 35/125 (28.0%) | 29/102 (28.4%) |
| 2                                                                              | 35/227 (15.4%)     | 29/125 (23.2%) | 6/102 (5.9%)   |
| 3                                                                              | 2/227 (0.9%)       | 1/125 (0.8%)   | 1/102 (1.0%)   |
| <b>Milrinone - Day 3</b>                                                       | 21/227 (9.3%)      | 11/125 (8.8%)  | 10/102 (9.8%)  |
| <b>Steroids (Hydrocortisone,<br/>Methylprednisolone [Solu-medrol]) - Day 3</b> | 28/227 (12.3%)     | 10/125 (8.0%)  | 18/102 (17.6%) |

|                                       |                |                |                |
|---------------------------------------|----------------|----------------|----------------|
| <b>Vasopressin (USP) - Day 3</b>      | 28/227 (12.3%) | 16/125 (12.8%) | 12/102 (11.8%) |
| <b>Survival to Hospital Discharge</b> | 113 (38.7%)    | 66 (43.1%)     | 47 (33.8%)     |
